# Supplementary material for: Genetically encoded in situ gelation redox-responsive collagen-like protein hydrogel for accelerating diabetic wound healing
Source: Royal Society of Chemistry journal article supplement (doi:10.1039/d3bm01010d), 2023-01-01
Supplement: d3bm01010d1.pdf [file d3bm01010d1.pdf]

## Supplementary information

### Genetically Encoded in situ Gelation Redox-Responsive Collagen-Like Protein Hydrogel for Accelerating Diabetic Wound Healing

Shuang Jia<sup>a\*</sup>, Jie Wang<sup>a\*</sup>, Xiaojie Wang<sup>a\*</sup>, Xing Liu<sup>a</sup>, Shubin Li<sup>b</sup>, Yimiao Li<sup>a</sup>, Jiaqi Li<sup>a</sup>, Jieqi Wang<sup>a</sup>, Shad Man<sup>a</sup>, Zhao Guo<sup>a</sup>, Yinan Sun<sup>a</sup>, Zhenzhen Jia<sup>c</sup>, Liyao Wang<sup>a</sup>, Xinyu Li<sup>a,d†</sup>

*a. State Key Laboratory of Reproductive Regulation & Breeding of Grassland Livestock, School of Life Sciences, Inner Mongolia University, Hohhot, 010020, PR China.*

*b. Department of Geriatric Medical Center, Inner Mongolia people's Hospital, 20 Zhaowuda Road, Hohhot, 010021, Inner Mongolia, China.*

*c. Shandong Provincial Key Laboratory of Animal Resistance Biology, Key Laboratory of Food Nutrition and Safety of Shandong Normal University, College of Life Science, Shandong Normal University, Jinan, 250014, PR China.*

*d. Institutes of Biomedical Sciences, Inner Mongolia University, Inner Mongolia University, Hohhot, 010020, PR China.*

\*. They contributed equally to this work.

†. Corresponding authors. E-mail addresses: XinyuLi@imu.edu.cn.

### Supplementary figure 1: Amino acid sequence of proteins

#### C1-eCLP3-C1

M **CGG**ADEQEEKAKVRTELIQELAQGLGGIEKKNFPTLGDEDLDHTYMTKLLTYLQEREQ  
**AENSWRKRLKGIQDHALDGGPCPPC**GPKGEQGPQGLPGKDGEAGAQQGPAGMPGAGE  
**QGEKGEPGTQGAKE**DRGETGPKGPKGERGEAGPAGKDGEPGPVGPAGPKGEQGPQGLP  
**GKDGEAGAQQGPAGMPGAGEQGEKGEPGTQGAKE**DRGETGPKGPKGERGEAGPAGKD  
**GEPGPVGPAGPKGEQGPQGLPGKDGEAGAQQGPAGMPGAGEQGEKGEPGTQGAKE**DRG  
**ETGPKGPKGERGEAGPAGKDGEPGPVGPAGGPCPPCRGDGGC**\*

## C2-eCLP3-C2

M **CGGCGG** ADEQEEKAKVRTELIQELAQGLGGIEKKNFPTLGDEDLDHTYMTKLLTYLQE  
REQAENSWRKRLKGIQDHALDGGPCPPC **GPKGEQGPQGLPGKDGEAGAQQPAGPMGP**  
**AGEQGEKGEPGTQGAKEDRGETGPKGPKGERGEAGPAGKDGEPGPVGPA** **GPKGEQGPQ**  
**GLPGKDGEAGAQQPAGPMGPAGEQGEKGEPGTQGAKEDRGETGPKGPKGERGEAGPAG**  
**KDGEPGPVGPA** **GPKGEQGPQGLPGKDGEAGAQQPAGPMGPAGEQGEKGEPGTQGAKED**  
**RGETGPKGPKGERGEAGPAGKDGEPGPVGPA** **GGPCPPC** **RGD** **GGCGGC**\*

Amino acid sequence of C1-eCLP3-C1. **CGG**; **V-domain**; **CPPC**; **Collagen-like domain-1**;  
**Collagen-like domain-2**; **Collagen-like domain-3**; **RGD**.

## Supplementary Table 1: Proteomics of eCLP3 template protein

| Protein description                      | Score   | Coverage                   | # Peptides | # PSMs | # AAs   | MW [kDa]        | calc. pI |
|------------------------------------------|---------|----------------------------|------------|--------|---------|-----------------|----------|
| eCLP3                                    | 6442.00 | 73.00                      | 20         | 199    | 363.00  | 36.40           | 5.90     |
| Sequence                                 | PSMs    | Modifications              | IonScore   | Charge | MH+[Da] | $\Delta$ M[ppm] | RT [min] |
| DGEPGPVGPAGPK                            | 40      |                            | 53         | 2      | 1177.58 | 0.51            | 25.23    |
| DGEPGPVGPAGPKGEQGPQGLPGK                 | 1       |                            | 46         | 2      | 2226.11 | -0.17           | 12.31    |
| EQAENSWR                                 | 1       |                            | 39         | 2      | 1019.45 | 0.23            | 8.31     |
| GEAGPAGKDGEPPVGPAGPK                     | 11      |                            | 98         | 2      | 1844.91 | 2.66            | 9.69     |
| GEPGTQGAK                                | 1       |                            | 31         | 2      | 844.42  | -0.99           | 5.66     |
| GEPGTQGAKEGDRGETGPK                      | 2       |                            | 55         | 2      | 1813.87 | 1               | 6.69     |
| GEQGPQGLPGK                              | 17      |                            | 37         | 2      | 1067.55 | 2.08            | 9.34     |
| GEQGPQGLPGKDGEAGAQQPAGPMGPAGEQGEK        | 2       |                            | 81         | 2      | 3059.41 | 0.83            | 12.32    |
| GEQGPQGLPGKDGEAGAQQPAGPMGPAGEQGEK        | 2       | 1xOxidation[M24]           | 36         | 3      | 3075.41 | 1.18            | 10.78    |
| GEQGPQGLPGKDGEAGAQQPAGPMGPAGEQGEKGEPGTQG | 1       | 1xOxidation[M24]           | 32         | 3      | 3900.81 | 1.77            | 10.53    |
| GIQDHALDGGPCPPCR                         | 1       | 2xCarbamidomethyl[C12;C15] | 24         | 3      | 1749.78 | -0.26           | 11.38    |
| GPKGEQGPQGLPGK                           | 2       |                            | 67         | 2      | 1349.72 | 0.65            | 8.28     |
| KNFPTLGDELDHTYMTK                        | 1       |                            | 61         | 3      | 2124.99 | 2.38            | 15.02    |
| KNFPTLGDELDHTYMTK                        | 2       | 1xOxidation[M16]           | 56         | 2      | 2140.99 | 1.29            | 13.24    |
| LLTYLQER                                 | 43      |                            | 59         | 2      | 1035.58 | -0.02           | 14.76    |
| LLTYLQEREQAENSWR                         | 1       |                            | 26         | 3      | 2036.02 | -0.52           | 15.57    |
| NFPTLGDELDHTYMTK                         | 5       |                            | 131        | 2      | 1996.90 | 5.01            | 16.96    |
| NFPTLGDELDHTYMTK                         | 11      | 1xOxidation[M15]           | 91         | 2      | 2012.89 | 0.46            | 16.45    |
| TELIQELAQGLGGIEK                         | 36      |                            | 93         | 2      | 1698.93 | 0.75            | 24.03    |

---

|                    |   |    |   |         |       |       |
|--------------------|---|----|---|---------|-------|-------|
| TELIQELAQGLGGIEKK  | 2 | 73 | 2 | 1827.02 | -0.5  | 22.03 |
| VRTELIQELAQGLGGIEK | 1 | 95 | 2 | 1954.10 | -1.39 | 21.90 |

---

## Supplementary figure 2: Amino acid sequence of proteins

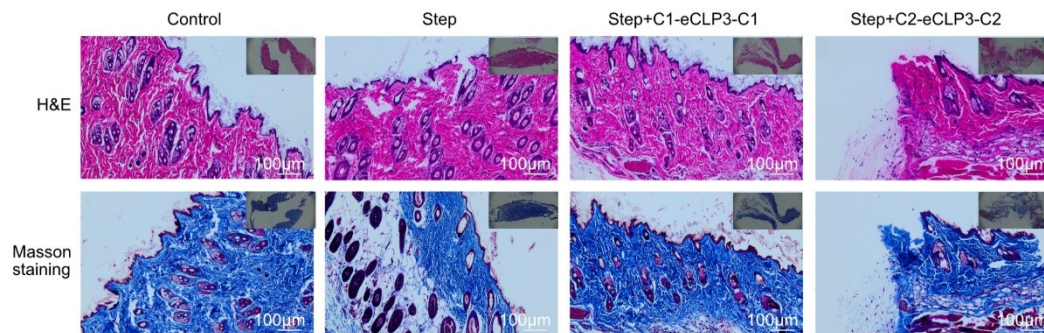

Supplementary figure2. Hematoxylin-eosin (H&E) and Masson's trichrome staining were performed to investigate the effects of the hydrogels on wound repair.
